# Supplementary material for: Midwives’ Voices on Postpartum Hemorrhage: An Exploratory Qualitative Study
Source: Research Square preprint supplement (doi:10.21203/rs.3.rs-7987833/v1), 2025-11-24
Supplement: Supplementary file 1 [file 1360ddf857d83ced390d7c8f.docx]

**Information Form**

1. Age: …………………….

2. Gender:

( ) Female ( ) Male

3. Marital Status:

( ) Married ( ) Single

4. Your Educational Status:

(1) High School (2) Undergraduate (3) Postgraduate

5. Working hours as a Midwife/Nurse:

6. Working hours in the Maternity Ward and/or Delivery Room:

7. Have you received Emergency Obstetric Care Training?

( ) yes ( ) no

**Semi-structured interview questions:**

1. Could you please tell me about your experiences regarding postpartum hemorrhage prevention in the institution you work in?

2. Could you please tell me about your experiences with diagnosing postpartum hemorrhage at the institution you work at?

please tell me about your experiences with managing postpartum hemorrhage in the institution you work in?

4. Could you please tell me about the difficulties you have experienced in preventing postpartum hemorrhage in the institution you work in?

Sub-question: Could you talk about the facilitating factors?

Sub-question: What do you think are the shortcomings in preventing postpartum hemorrhage?

5. Could you please tell me about the difficulties you experienced in diagnosing postpartum hemorrhage in the institution you work in?

Sub-question: Could you talk about the facilitating factors?

Sub-question: What do you think are the missing points in diagnosing postpartum hemorrhage?

6. Could you please tell me about the difficulties you experienced in managing postpartum hemorrhage in the institution you work in?

Sub-question: Could you talk about the facilitating factors?

Sub-question: What do you think are the shortcomings in managing postpartum hemorrhage?

7. Finally, as a midwife, could you please tell us your opinions and suggestions on the subject?

Sub-question: What are your views?

Sub-question: What are your recommendations?
